# Supplementary material
Source: Research Square preprint supplement (doi:10.21203/rs.3.rs-9456097/v1)
Supplement: Supplementary file 1 [file 08e1a599431d6b7b878167f2.docx]

**Appendix 1- Topic guide - Implementers**

**Interviewee role**

1. Please could you tell me about your current role (profession and time in the role)?
2. What role have you played in the design or implementation of the Generation Study?
3. Has it been clear what will be required of you during the implementation of the Generation Study? (NPT)

**Design of the study**

1. What do you think is the purpose of the Generation Study?
2. Do you know why the Generation Study was developed? Did it respond to policies or other interventions taking place nationally?
3. Do you see any benefits to the programme compared to what is out there already in this field? (NPT)
4. Do you know what the components or activities of the Generation Study are?
5. What do you think are the main outcomes is the Generation Study trying to achieve? (short-term outcomes and long-term outcomes)

**Acceptability of the implementation of the study**

1. Do you have any insights into parent’s perceptions and experiences of the Generation Study? (over the consent, sample collection, results stages)
2. Why do you think parents give or decline consent?
3. How do you think parents feel about the three aims of the Generation Study?
   1. Screening their baby for childhood-onset rare genetic conditions to allow for early diagnosis.
   2. Research use – using de-identified genomes to improve knowledge about the condition and identify potential treatments.
   3. Lifetime genome – reanalysing the genomes of that baby to design their care plan.
4. What do you think needs to happen for parents to find the GenerationStudyacceptable? (NPT)
5. What are your perceptions of the use of genomic data for the Generation Study? Do you think the study should use the data for all the ways listed?
6. How has implementing this study affected you? (workload or personally/emotionally) (NPT)

**Feasibility of the implementation of the study**

1. Is it feasible for you to continue your role in the implementation of the programme along with your other work commitments? (NPT)
   1. If not, what do you think needs to change?
2. What support have you had from key stakeholders to implement the study? (colleagues, senior/national level staff)

**Impact of the study**

1. What positive impacts have been identified from the Generation Study already?
2. What risks or unintended consequences have been identified from the Generation Study so far?

- Patient experience
- Uncertainty of results
- Access/Quality of care
- Equity of access for underserved communities (e.g. geography, culture, language, education, technological capability)
- Impacts on staff
- Diversion of staff/funding from other areas

**Barriers and facilitators**

1. What barriers have you encountered during the implementation of the Generation Study and were you able overcome them?
2. Do you anticipate any other challenges that may arise at the consent stage, sample collection stage, sample analysis stage, returning results or therapeutic stages of the Generation Study?

- How do you think these could be prevented or overcome?

1. What facilitators have you encountered during the implementation of the Generation Study

**Personal experience and reflections**

1. Is there anything you think needs to be done differently to the programme design or its implementation? (NPT)
2. If you were to give advice to another team designing or implementing a similar programme, what would you say to them?
3. What are your thoughts about implementing genomic newborn screening as a national screening service?
4. What do you think needs to happen to roll out this programme at a national scale? (CFIR)

- Workforce/staff – do they have the experience or training required? (NPT)
- Costs and resource use (including staffing)
- Buy in from key stakeholders

1. Is there anything you would like to add that we haven’t already talked about?
