# Supplementary material
Source: Research Square preprint supplement (doi:10.21203/rs.3.rs-9456097/v1)
Supplement: Supplementary file 2 [file f99bb0e48e587a0212aea5db.docx]

**Appendix 2-Structured observation guide**

|  | **Identifying parents** | **Consenting parents including declines** | **Reporting of results** |
| --- | --- | --- | --- |
| Actors involved |  |  |  |
| Main activities |  |  |  |
| Processes or procedures followed for the domains in bold |  |  |  |
| Individual or organisational adaptations to the implementation processes |  |  |  |
| Challenges faced |  |  |  |
| Impact on staff time |  |  |  |
| Educational or training needs |  |  |  |
| *Approaches to reaching parents from diverse backgrounds  ** Reasons parents accept or decline gNBS | * | ** | N/A |
